# Supplementary material for: Molecular dynamics simulation study of adsorption of anionic–nonionic surfactants at oil/water interfaces
Source: Royal Society of Chemistry journal article supplement (doi:10.1039/d2ra04772a), 2022-01-01
Supplement: d2ra04772a1.pdf [file d2ra04772a1.pdf]

Molecular dynamics study of adsorption of anionic-nonionic surfactants at oil/water interfaces

Peng Shi<sup>a,b</sup>, Haibin Luo<sup>b</sup>, xuefei Tan<sup>a</sup>, yang Lu<sup>a</sup>, Hui Zhang<sup>c</sup>, Xin Yang<sup>b,1</sup>

<sup>a</sup> *College of materials and chemical engineering, Heilongjiang Institute of Technology, Harbin 150026, People's Republic of China*

<sup>b</sup> *College of Chemical Engineering, Harbin Institute of Petroleum, Harbin 150028, People's Republic of China*

<sup>c</sup> *College of Science, Harbin University of Science and Technology, Harbin 150080, People's Republic of China*

## **Figure Captions**

Figure S1 Relationship between energy and time

Figure S2 The variation curve of SASA of surfactants with time

Figure S3 Simulation configurations at different times

Figure S4 Curves of interfacial tension and interfacial thickness with concentration

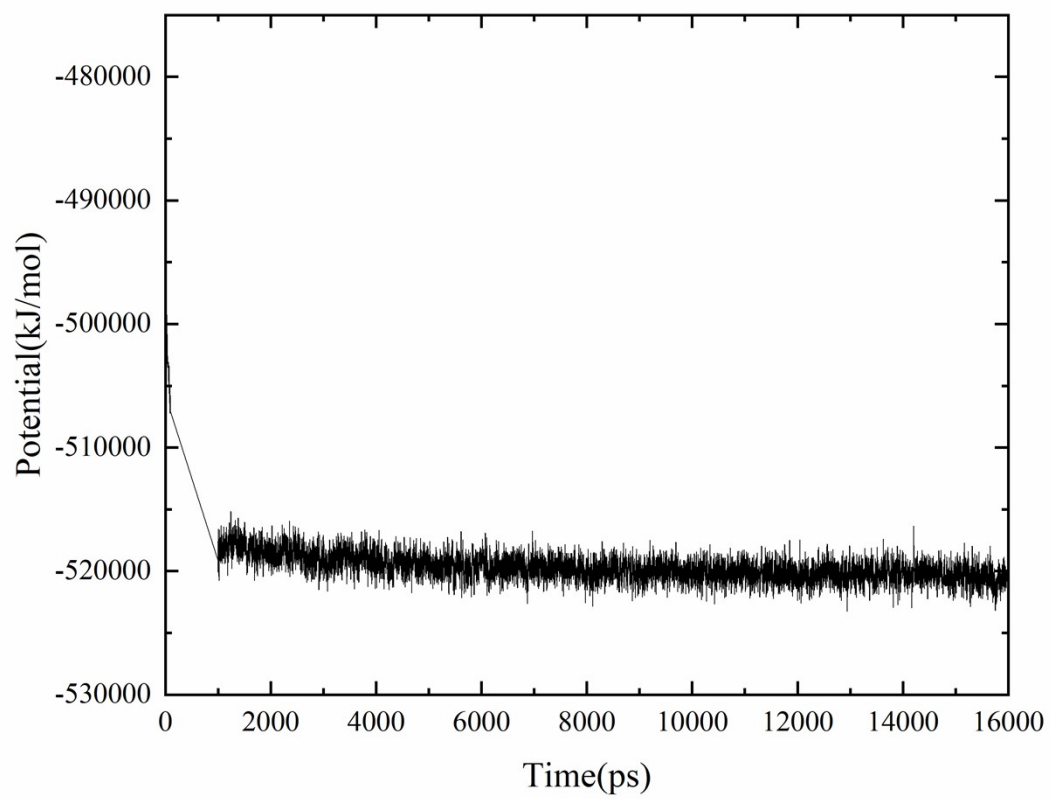

Figure S1 Relationship between energy and time

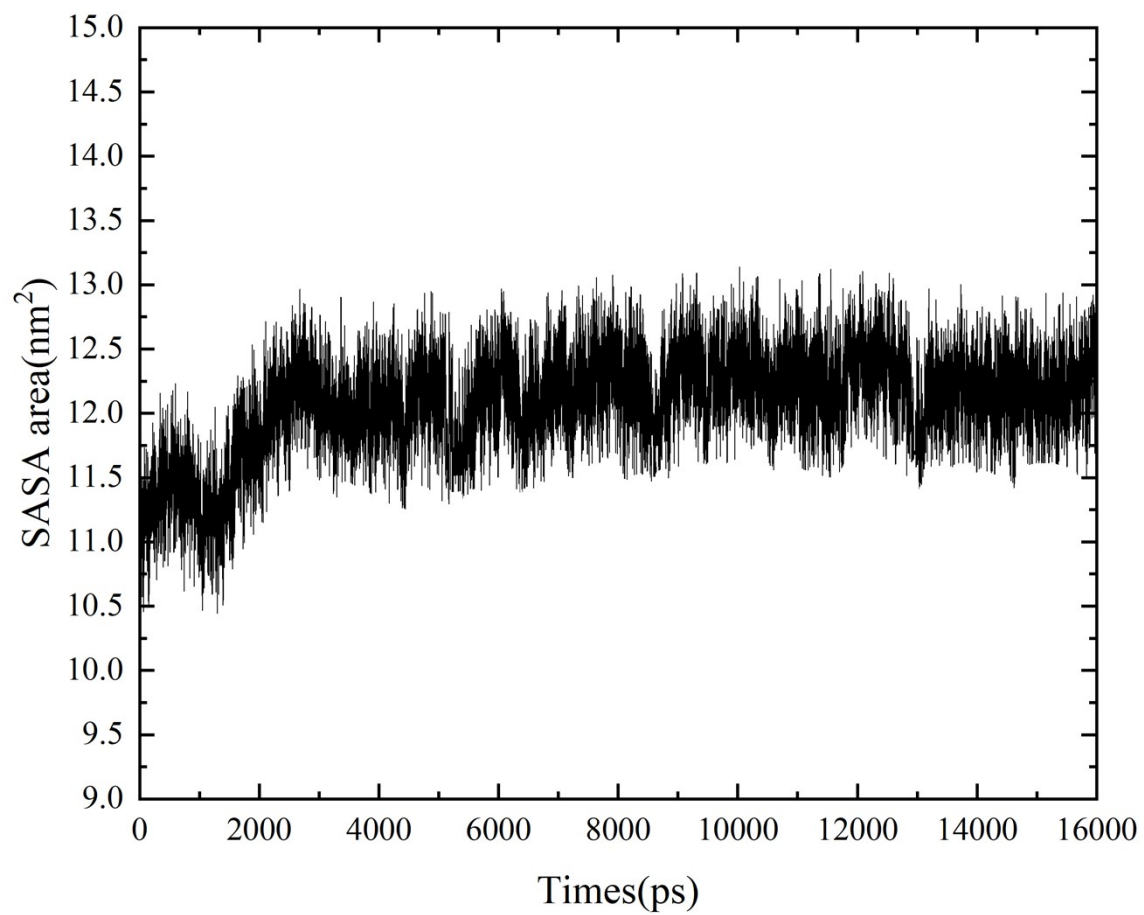

Figure S2 The variation curve of SASA of surfactants with time

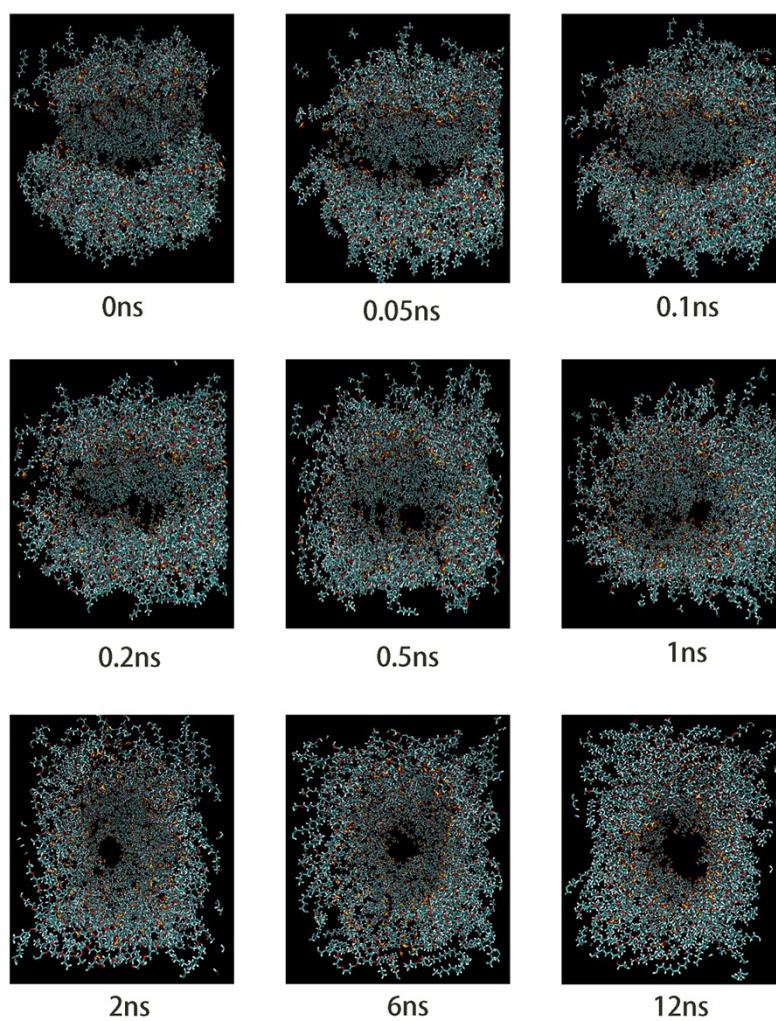

Figure S3 Simulation configurations at different times (PO<sub>6</sub> surfactant molecules was 180, Sulfur, oxygen, and carbon belonging to the surfactant molecules were shown in yellow, red, and green, water and oil molecules components were not shown clarity)

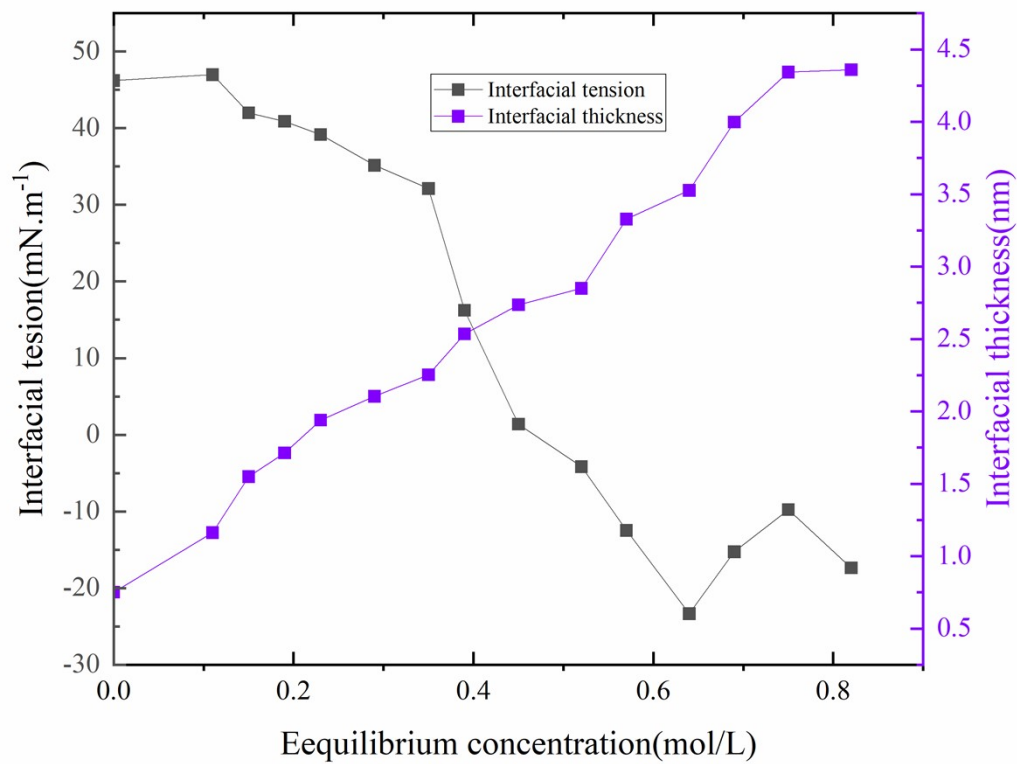

Figure S4 Curves of interfacial tension and interfacial thickness with concentration
